# Supplementary material for: Construct validity and reliability of the Finnish version of the Knee Injury and Osteoarthritis Outcome Score
Source: Springer Nature journal article supplement (doi:10.1186/s12891-018-2078-7), 2018-05-22
Supplement: MOESM1 [file 15782196]

**KOOS KNEE QUESTIONNAIRE**  
**(Back-translation of the Finnish version of the KOOS questionnaire)**

Today's date: \_\_\_\_\_ Date of birth: \_\_\_\_\_

Name: \_\_\_\_\_

**INSTRUCTIONS:** This form contains questions about how you experience the situation regarding your knee. This information will help us monitor the condition of your knee and how well you are able to cope in your everyday activities.

Answer each question by ticking just one response option. Tick the option that best corresponds to your situation.

**Symptoms**

Answer the following questions considering the knee symptoms you have experienced during the past week:

S1. Do you experience swelling/inflammation of the knee?

Never  Rarely  Sometimes  Often  Constantly

S2. Do you feel a cracking sensation, hear popping or other kinds of sounds when moving your knee?

Never  Rarely  Sometimes  Often  Constantly

S3. Does your knee jam or lock when you are walking?

Never  Rarely  Sometimes  Often  Constantly

S4. Can you straighten your knee all the way?

Always  Often  Sometimes  Rarely  Never

S5. Can you bend your knee all the way?

Always  Often  Sometimes  Rarely  Never

**Stiffness**

The following questions concern stiffness in your knee during the past week. Stiffness means experiencing restricted or slow movement of the knee joint.

S6. How stiff is your knee after waking up in the morning?

Not at all  A little stiff  Fairly stiff  Very stiff  Extremely stiff

S7. How stiff is your knee after sitting, lying down or resting during the day?

Not at all  A little stiff  Fairly stiff  Very stiff  Extremely stiff

## Pain

P1. How often do you experience pain in your knee?

Never

About once a  
month

About once a  
week

Daily

Continuously

To what extent have you felt knee pain when performing the following actions during the past week?

P2. Turning or twisting the knee

No pain at all

Slightly

Moderately

Strongly

Very strongly

P3. When straightening the knee all the way

No pain at all

Slightly

Moderately

Strongly

Very strongly

P4. When bending the knee all the way

No pain at all

Slightly

Moderately

Strongly

Very strongly

P5. When walking on a level surface

No pain at all

Slightly

Moderately

Strongly

Very strongly

P6. When going up or down stairs

No pain at all

Slightly

Moderately

Strongly

Very strongly

P7. When in bed at night (pain interferes with sleep)

No pain at all

Slightly

Moderately

Strongly

Very strongly

P8. When sitting or lying down

No pain at all

Slightly

Moderately

Strongly

Very strongly

P9. When standing

No pain at all

Slightly

Moderately

Strongly

Very strongly

## Ability to perform daily activities

The following questions concern your ability to perform physical activities, meaning moving about and looking after yourself. Mark the option that best describes the extent to which the condition of your knee has affected your ability to perform the following activities during the past week.

A1. Descending stairs

Not at all

A little

Moderately

A lot

Very much

A2. Ascending stairs

Not at all

A little

Moderately

A lot

Very much

- A3. Rising from a chair  
 Not at all  A little  Moderately  A lot  Very much
- A4. Standing up  
 Not at all  A little  Moderately  A lot  Very much
- A5. Bending down, for example to pick up something from the floor  
 Not at all  A little  Moderately  A lot  Very much
- A6. Walking on a level surface  
 Not at all  A little  Moderately  A lot  Very much
- A7. Getting into a car/out of a car  
 Not at all  A little  Moderately  A lot  Very much
- A8. Going shopping  
 Not at all  A little  Moderately  A lot  Very much
- A9. Putting on socks  
 Not at all  A little  Moderately  A lot  Very much
- A10. Getting out of bed  
 Not at all  A little  Moderately  A lot  Very much
- A11. Taking off socks  
 Not at all  A little  Moderately  A lot  Very much
- A12. When lying in bed (turning, maintaining position of the knee)  
 Not at all  A little  Moderately  A lot  Very much
- A13. Getting into or out of the bath/shower  
 Not at all  A little  Moderately  A lot  Very much
- A14. When sitting  
 Not at all  A little  Moderately  A lot  Very much
- A15. When sitting on or rising from a pedestal toilet  
 Not at all  A little  Moderately  A lot  Very much
- A16. Doing heavy domestic chores (e.g., snow-clearing, mopping floors)  
 Not at all  A little  Moderately  A lot  Very much

A17. Doing light domestic chores (e.g., cooking, dusting)

Not at all      A little      Moderately      A lot      Very much  
                       

### Function, sports and recreational activities

The following questions concern your ability to be physically active. Mark the option that best describes the extent to which the condition of your knee has affected your ability to perform the following activities during the past week.

SP1. Squatting

Not at all      A little      Moderately      A lot      Very much  
                       

SP2. Running

Not at all      A little      Moderately      A lot      Very much  
                       

SP3. Jumping

Not at all      A little      Moderately      A lot      Very much  
                       

SP4. Turning/twisting using the injured knee

Not at all      A little      Moderately      A lot      Very much  
                       

SP5. Kneeling

Not at all      A little      Moderately      A lot      Very much  
                       

### Quality of Life

Q1. How often do you think about your knee problem?

Never      About once a month      About once a week      Daily      Continuously  
                       

Q2. Have you changed your lifestyle to avoid possible knee-damaging activities?

Not at all      A little      Moderately      A lot      Very much  
                       

Q3. How many problems are caused by your not being able to fully trust your knee function?

No problems      A few problems      Some problems      Quite a lot of problems      Very many problems  
                       

Q4. In general, how much difficulty does your knee cause you?

Not at all      A little      Moderately      A lot      Very much  
                       

**Thank you very much for answering all the questions on this form.**
